# Supplementary material
Source: HighWire-hosted journal article supplement (http://d2538ggaoe6cji.cloudfront.net/highwire/filestream/37643/field_highwire_adjunct_files/1/127936-2.pdf)

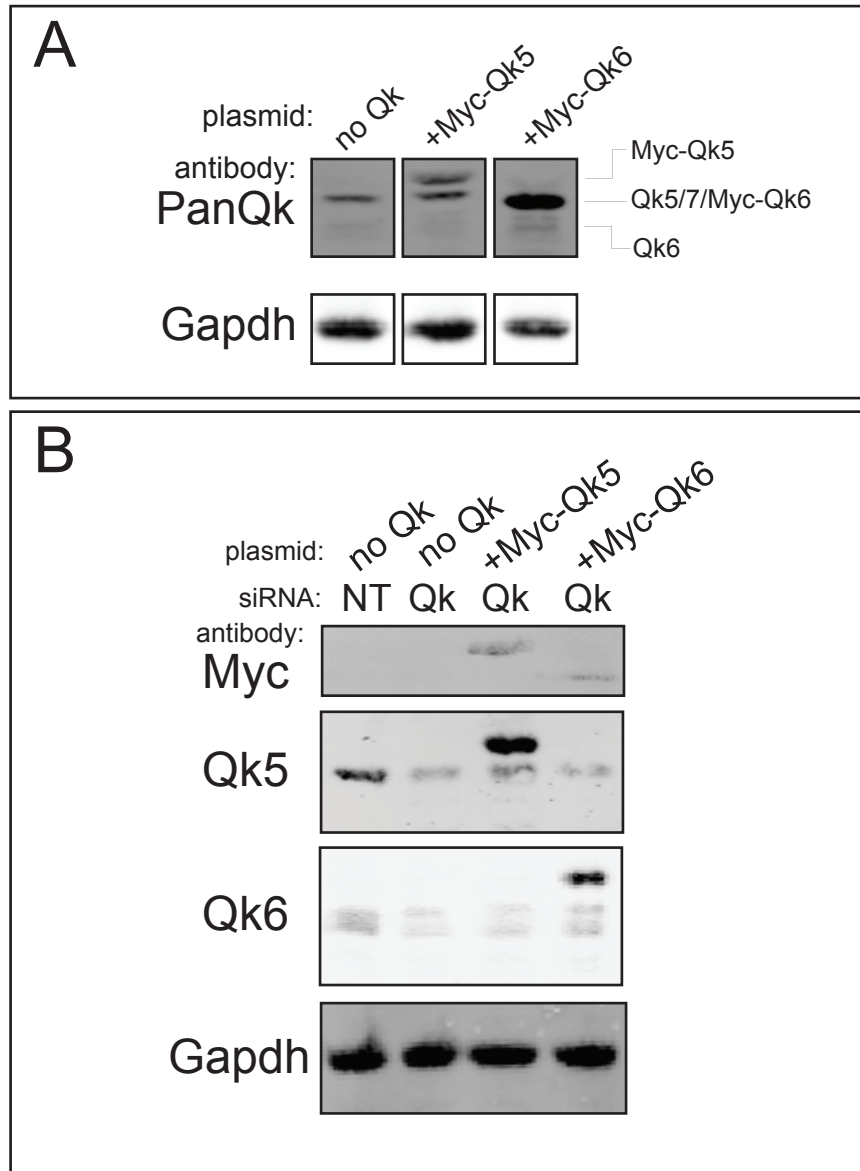

Supplement: 127936-2.pdf [file 127936-2.pdf]
